# Supplementary material
Source: publisher figshare collection journal article supplement (https://acs.figshare.com/ndownloader/files/4682434)
Supplement: Supplementary file 1 [file 4682434]

Supporting Information

**Insertion of a Bulky Rhodium Complex  
into a DNA Cytosine-Cytosine Mismatch:  
An NMR Solution Study**

*Christine Cordier<sup>†</sup>, Valérie C. Pierre<sup>§</sup>, Jacqueline K. Barton\**

Division of Chemistry and Chemical Engineering,

California Institute of Technology, Pasadena, California 91125, USA

\* to whom correspondence should be addressed at [jkbarton@caltech.edu](mailto:jkbarton@caltech.edu)

<sup>†</sup> Current address: ITODYS, UMR CNRS 7086, Université Denis Diderot, Paris VII, 1 rue Guy de la Brosse, 75005 Paris, France. <sup>§</sup> Current address: Department of Chemistry, University of Minnesota, 207 Pleasant St., SE, Minneapolis, MN 55455, USA.

**Table S1.** NOE contacts of the free oligonucleotide d(CGGACTCCG). All chemical shifts are relative to DSS-d<sub>6</sub> ( $\delta = 0.000$  ppm). The chemical shifts of the non-exchangeable and exchangeable protons were measured at 10 °C and 4 °C respectively. Experimental conditions: [dsDNA] = 2.32 mM, 50 mM Pi, 20 mM NaCl, pH = 6.10(2).

| Residue | H6/H8 | H1'   | H5/H2/Me | H2'   | H2''  | H3'   | H4'   | H5'   | H5''  | NH / NH <sub>2</sub> |
|---------|-------|-------|----------|-------|-------|-------|-------|-------|-------|----------------------|
| C1      | 7.615 | 5.758 | 5.929    | 1.852 | 2.352 | 4.692 | 4.062 | 3.962 | 3.705 | 8.334-7.245          |
| G2      | 7.921 | 5.477 | -        | 2.676 | 2.698 | 4.707 | 4.304 | 4.072 | 3.962 | 13.292               |
| G3      | 7.799 | 5.648 | -        | 2.647 | 2.755 | 5.037 | 4.414 | 4.194 | 4.133 | 12.804               |
| A4      | 8.182 | 6.259 | 7.957    | 2.749 | 2.829 | 4.954 | 4.215 | 4.499 | 4.414 | -                    |
| C5      | 7.261 | 5.721 | 5.404    | 2.431 | 1.772 | 4.695 | 4.102 | 4.365 | 4.047 | -                    |
| T6      | 7.615 | 6.051 | 1.689    | 2.369 | 2.534 | 4.891 | 4.238 | ?     | 4.047 | 14.406               |
| C7      | 7.603 | 6.002 | 5.721    | 2.153 | 2.448 | 4.823 | 4.175 | 4.108 | ?     | 8.481-6.961          |
| C8      | 7.542 | 5.672 | 5.734    | 2.034 | 2.369 | 4.854 | 4.141 | 4.108 | 4.072 | 8.823-7.210          |
| G9      | 8.019 | 6.222 | -        | 2.681 | 2.386 | 4.719 | 4.210 | 4.145 | 4.096 | 13.230               |

**Table S2.** NOE connectivities of the Rh-bound oligonucleotide. All chemical shifts are relative to DSS-d<sub>6</sub> ( $\delta = 0.000$  ppm). The chemical shifts of the non-exchangeable and exchangeable protons were measured at 10 °C and 4 °C respectively. The two nOe walks resulting from the loss of the C<sub>2</sub> symmetry in the central part of the oligonucleotide are indicated as a (blue) and b (green). For A<sub>4</sub>, only the amino protons of the a and b strands were distinguishable. Experimental conditions: [dsDNA] = 1.62 mM, [ $\Delta$ -Rh(bpy-*d*<sub>8</sub>)<sub>2</sub>chrysi<sup>3+</sup>] = 1.62 mM (1 equivalent per mismatch), 50 mM Pi, 20 mM NaCl, pH = 6.10(2). § Ambiguous assignment. Line broadening and overlaps render the distinction between H5' and H5'' uncertain.

| Residue | H6/H8 | H1'   | H5/H2/Me | H2'   | H2''  | H3'   | H4'                | H5' / H5''    | NH / NH <sub>2</sub> |
|---------|-------|-------|----------|-------|-------|-------|--------------------|---------------|----------------------|
| C1      | 7.583 | 5.699 | 5.676    | 1.795 | 2.318 | 4.698 | 4.095 <sup>§</sup> | 3.948 - 3.948 | 8.333-6.905          |
| G2      | 7.908 | 5.441 | -        | 2.619 | 2.619 | 5.022 | 4.192              | 4.192 - 4.026 | 13.222               |
| G3      | 7.791 | 5.555 | -        | 2.622 | 2.642 | 5.051 | 4.351              | 4.130 - 4.026 | 13.222               |
| A4a     | 7.972 | 6.017 | 7.973    | 2.210 | 2.545 | 4.857 | 4.413              | 4.114 - 3.974 | 8.421-6.959          |
| A4b     | "     | "     | "        | "     | "     | "     | "                  | "             | 8.323-7.208          |
| C5a     | 7.661 | 6.083 | 5.741    | 2.239 | 2.366 | 4.817 | 4.413              | 4.049 - 3.952 | -                    |
| C5b     | 7.557 | 5.829 | 5.881    | 2.261 | 2.398 | 4.897 | 4.660              | 4.017 - 3.978 | -                    |
| T6a     | 7.615 | 5.744 | 1.946    | 2.199 | 2.369 | 4.875 | 4.420              | 4.140 - 3.965 | 12.793               |
| T6b     | 7.511 | 5.679 | 1.940    | 2.053 | 2.364 | 4.527 | 4.283              | 4.101 - 3.978 | 12.793               |
| C7      | 7.557 | 5.715 | 5.786    | 2.097 | 2.443 | 4.840 | 4.156              | 4.101 - ?     | 8.743-7.227          |
| C8      | 7.550 | 5.503 | 5.773    | 2.125 | 2.369 | 4.892 | 4.108              | 4.049 - ?     | 8.743-7.217          |
| G9      | 7.973 | 6.147 | -        | 2.704 | 2.368 | 4.694 | 4.192              | 4.121 - 4.065 | 12.793               |

**Table S3.** Chemical shifts of the hydrogens of the chrysi ligand in the absence and presence of mismatched DNA. All chemical shifts are relative to DSS- $d_6$  ( $\delta = 0.000$  ppm). Experimental conditions: [dsDNA] = 1.62 mM, [ $\Delta$ -Rh(bpy- $d_8$ ) $_2$ chrysi $^{3+}$ ] = 1.62 mM (1 equivalent per mismatch), 50 mM Pi, 20 mM NaCl, pH = 6.10(2). The chemical shifts of the non-exchangeable and exchangeable protons were measured at 10 °C and 4 °C respectively.

| Proton      | Unbound $\Delta$ -Rh(bpy- $d_8$ ) $_2$ chrysi $^{3+}$ | DNA bound by $\Delta$ -Rh(bpy- $d_8$ ) $_2$ chrysi $^{3+}$ |
|-------------|-------------------------------------------------------|------------------------------------------------------------|
| $\chi_0$    | 8.703                                                 | 13.032                                                     |
| $\chi_1$    | 8.164                                                 | 7.210                                                      |
| $\chi_2$    | 7.516                                                 | 7.018                                                      |
| $\chi_3$    | 7.767                                                 | 7.923                                                      |
| $\chi_4$    | 8.242                                                 | 6.188                                                      |
| $\chi_5$    | 8.303                                                 | 7.198                                                      |
| $\chi_6$    | 8.303                                                 | 7.934                                                      |
| $\chi_7$    | 8.059                                                 | 6.984                                                      |
| $\chi_8$    | 7.515                                                 | 7.241                                                      |
| $\chi_9$    | 7.393                                                 | 7.276                                                      |
| $\chi_{10}$ | 7.889                                                 | 7.364                                                      |
| $\chi_{11}$ | 8.703                                                 | 12.900                                                     |

**Table S4.** Intermolecular nOe between  $\Delta$ -Rh(bpy-*d*<sub>8</sub>)<sub>2</sub>chrysi<sup>3+</sup> and the oligonucleotide. The two strands, resulting from the loss of the C<sub>2</sub> symmetry in the central part of the oligonucleotide, are marked a and b. Experimental conditions: [dsDNA] = 1.62 mM, [ $\Delta$ -Rh(bpy-*d*<sub>8</sub>)<sub>2</sub>chrysi<sup>3+</sup>] = 1.62 mM (1 equivalent per mismatch), 50 mM Pi, 20 mM NaCl, pH = 6.10(2), D<sub>2</sub>O, 10 °C.

| NOEs from a strand     | NOEs from b strand  |
|------------------------|---------------------|
| $\chi$ 1 – T6aH2''     | $\chi$ 7 – C5bH1' w |
| $\chi$ 1 – T6aH5'/H5'' | $\chi$ 7 – T6bMe    |
| $\chi$ 1 – T6aMe       | $\chi$ 8 – C5bH4'   |
| $\chi$ 2 – C5aH1'      | $\chi$ 8 – C5bH5    |
| $\chi$ 2 – C5aH4'      | $\chi$ 8 – T6bMe    |
| $\chi$ 2 – T6aH2'      | $\chi$ 9 – C5bH4'   |
| $\chi$ 2 – T6aMe       | $\chi$ 9 – T6bH2''  |
| $\chi$ 2 – T6aH5'/H5'' | $\chi$ 9 – T6bMe    |
| $\chi$ 3 – C5aH1'      | $\chi$ 10 – T6bi    |
| $\chi$ 3 – C5aH4'      | $\chi$ 11 – T6bi    |
| $\chi$ 3 – T6aMe       |                     |

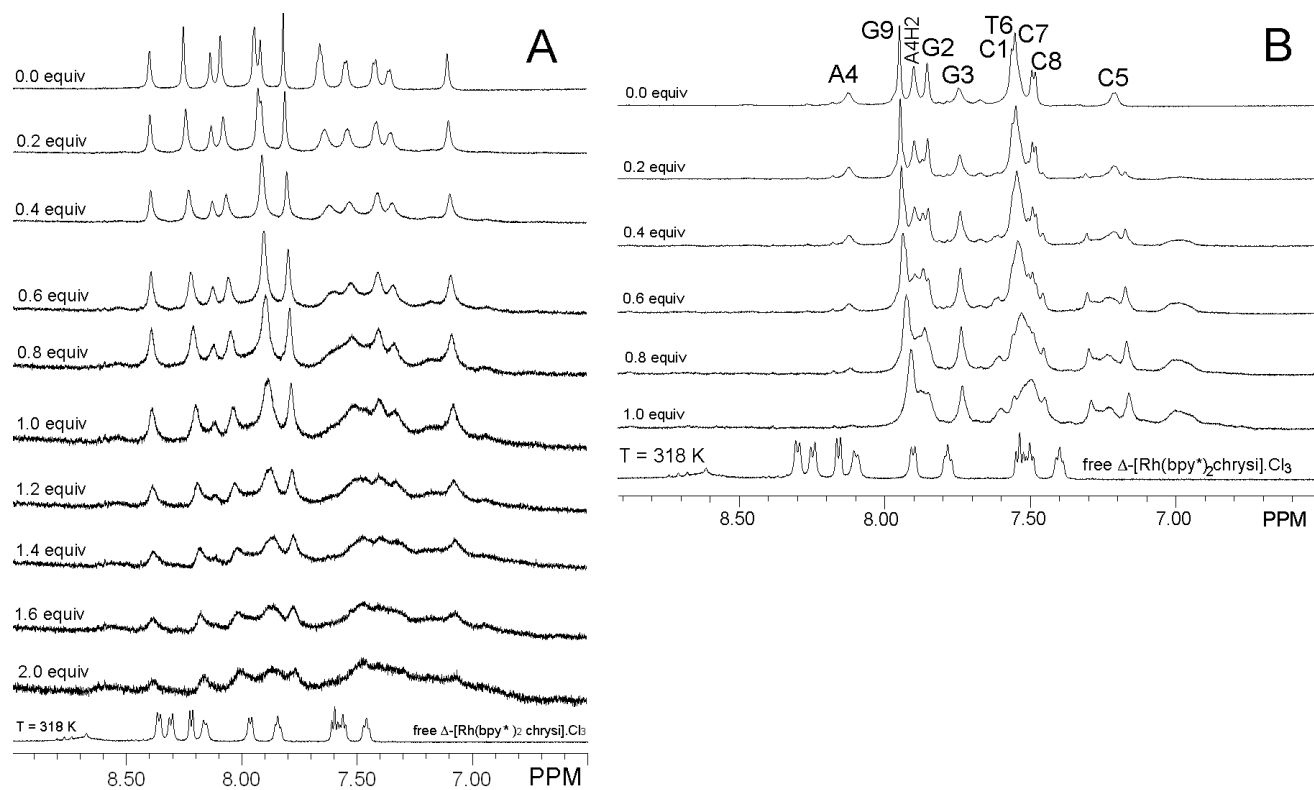

**Figure S1.** Titration of  $\Delta\text{-Rh}(\text{bpy-}d_8)_2\text{chrysi}^{3+}$  to (a) an oligonucleotide containing two CA mismatches ( $d(\text{CGATCGACCG})$ ,  $T_m = 13^\circ\text{C}$ ) and (b) an oligonucleotide containing a single CC mismatch ( $d(\text{CGGACTCCG})$ ,  $T_m = 17.8^\circ\text{C}$ ). For clarification, only the aromatic region is represented. Experimental conditions: phosphate buffer,  $I = 50\text{ mM}$ ,  $T = 20^\circ\text{C}$ , (a)  $\text{pH} = 6.03$ , (b)  $\text{pH} = 6.10$ .

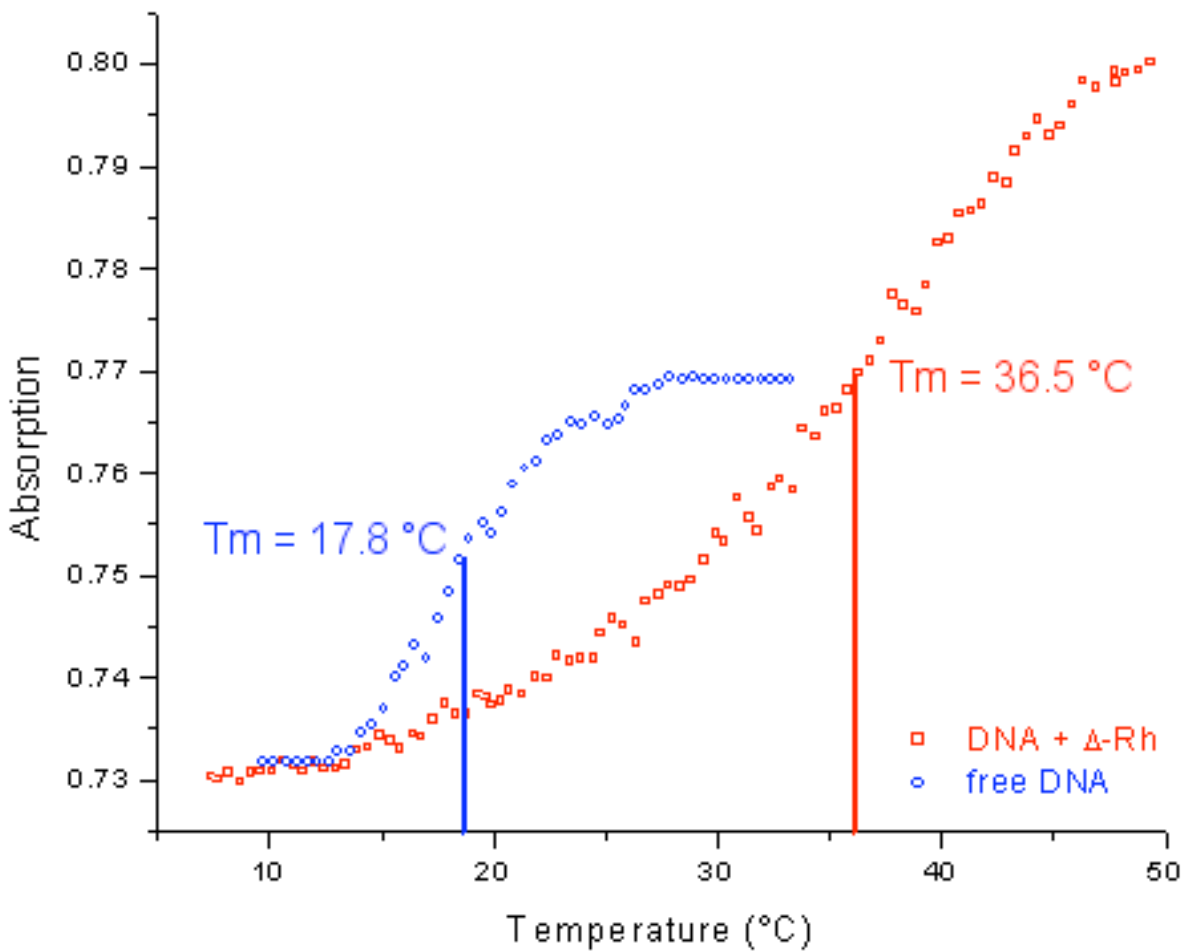

**Figure S2.** UV absorption at  $\lambda = 260\text{ nm}$  of the free oligonucleotide (blue circle) and the metalloinsertor-bound DNA (red square). The  $T_m$  values represent the midpoint of the transition as obtained by fitting the melting profiles with a sigmoidal expression.

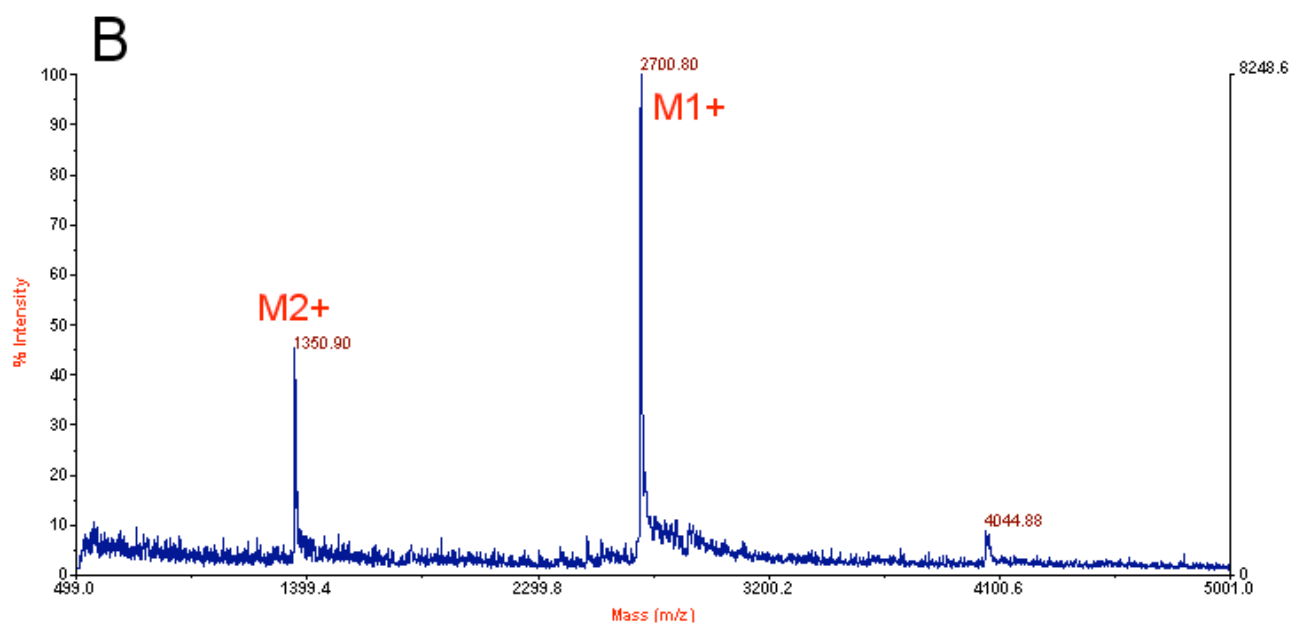

**Figure S3.** Photocleavage induced by the metalloinsertor. (a) MALDI-TOF mass spectrum obtained after 1 hour of irradiation with a solar simulator. The products correspond to cleavage at the T<sub>6</sub> neighboring the CC mismatch. (b) MALDI-TOF mass spectrum obtained on an identical sample without photo-irradiation. The M<sup>1+</sup> and M<sup>2+</sup> peaks correspond to the uncleaved 5'-CGGACTCCG-3' oligonucleotide.



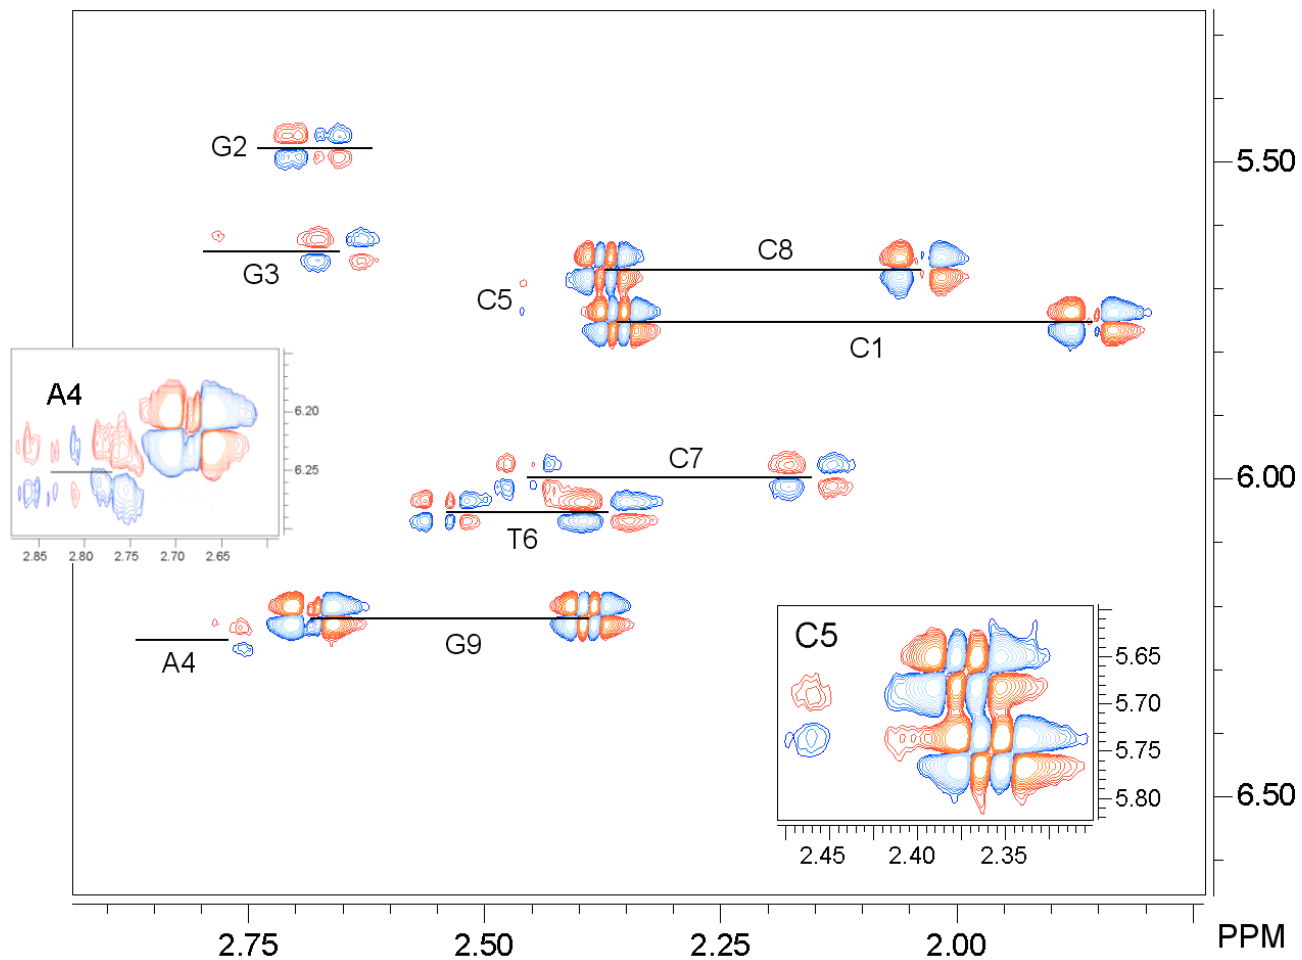

**Figure S4.** 2D DQF-COSY sub-spectrum of the free oligonucleotide at 10 °C ( $F2 \times F1 : H2'-H2'' \times H1'$ ). The crosspeak patterns indicate the conformation of the sugars. All sugars, including that of the mismatched cytosine, maintain the  $C_2'$ -endo pucker. Inserts: the crosspeaks associated to the A4 and C5 sugars are only visible at a lower signal-to-noise resolution.

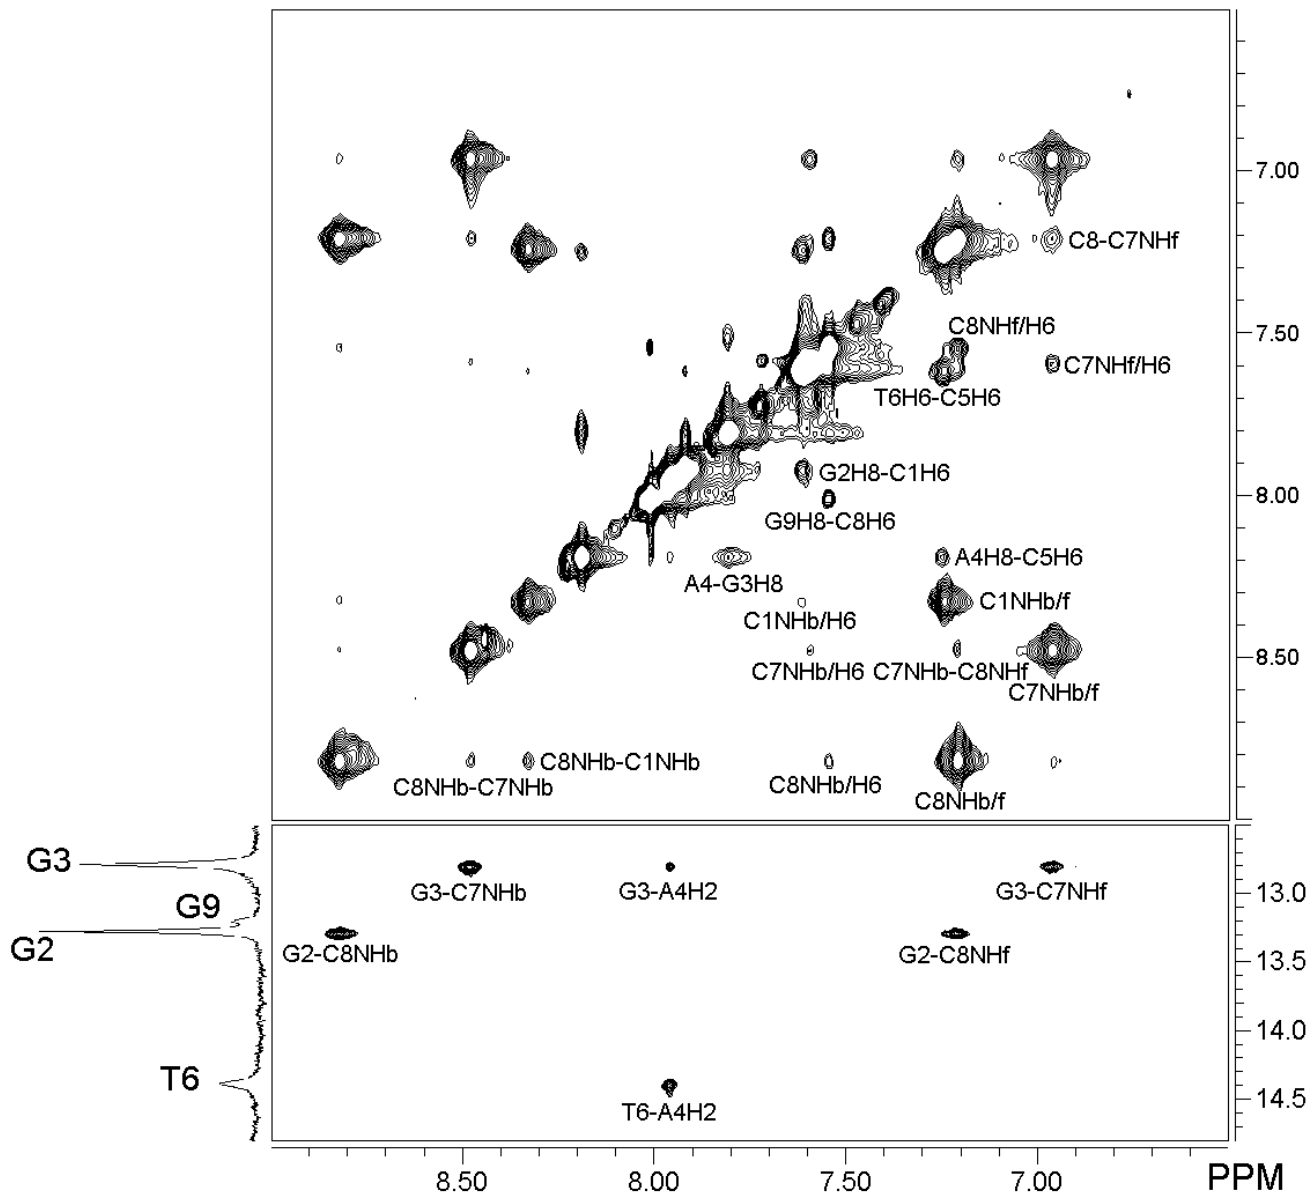

**Figure S5.** NOESY sub-spectra and assignments of the nOe contacts between the exchangeable protons of the free oligonucleotide (upper part: F2  $\times$  F1 : aromatic + amino  $\times$  aromatic + amino; lower part: F2  $\times$  F1 : aromatic + amino  $\times$  imino). The chemical shifts and the crosspeaks of the imino and amino protons indicate that all bases are Watson-Crick paired. No correlation is observed for the C-C mismatch, suggesting that the two cytosines are probably paired by a single hydrogen bond in a Wobble-type conformation. NHb and NHf correspond to the bound and free amino protons respectively. Experimental conditions: H<sub>2</sub>O, 4 °C, 300 ms mixing time.

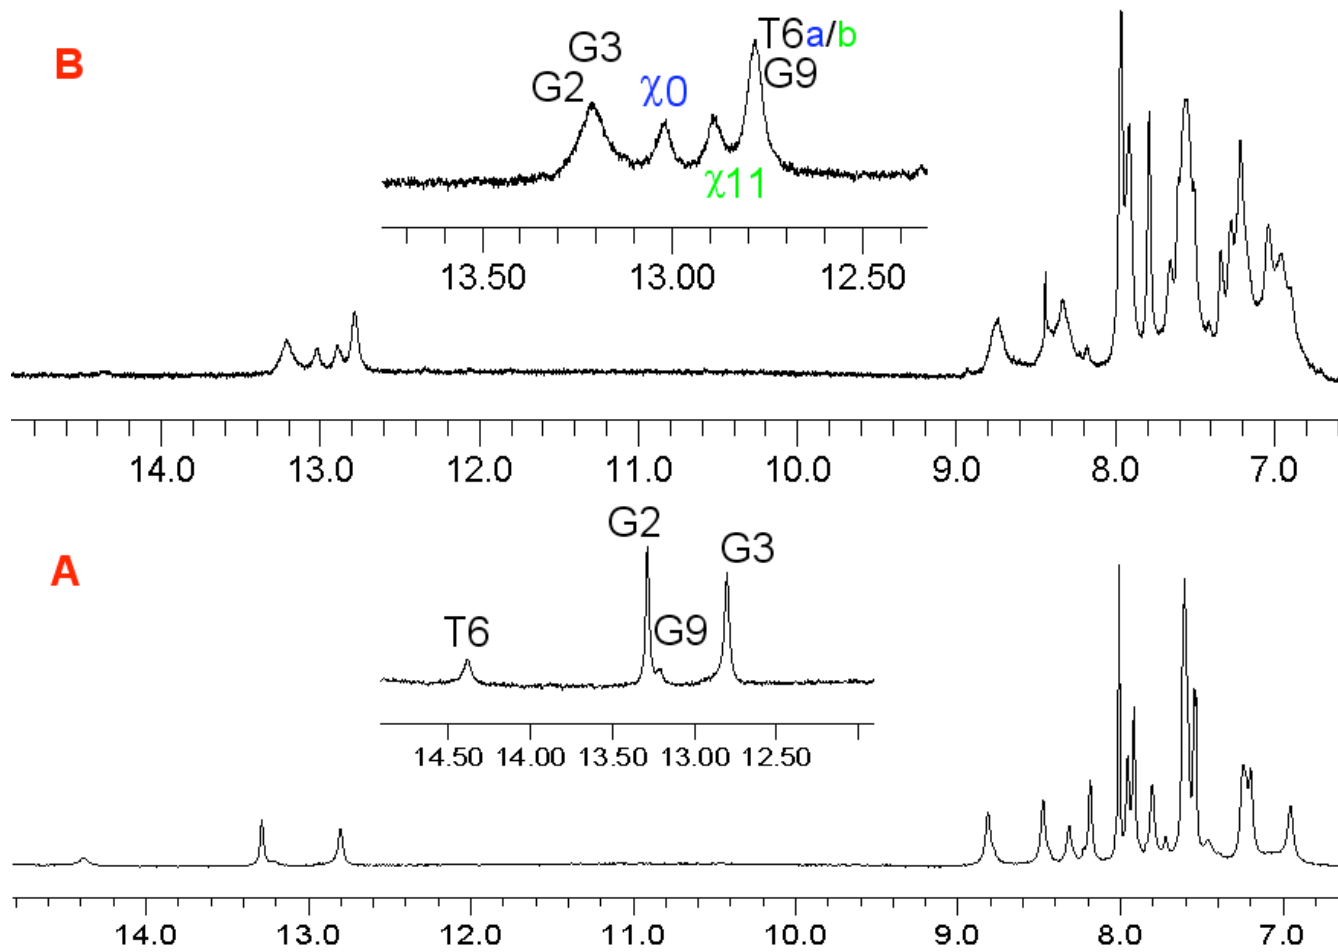

**Figure S6.** 1D  $^1\text{H}$  sub-spectra of the aromatic, amino and imino protons of (a) the free oligonucleotide and (b)  $\Delta\text{-Rh}(\text{bpy-}d_8)_2\text{chrysi}^{3+}$  inserted in the DNA-Rh adduct. Experimental conditions,  $\text{H}_2\text{O}$ ,  $4^\circ\text{C}$ .

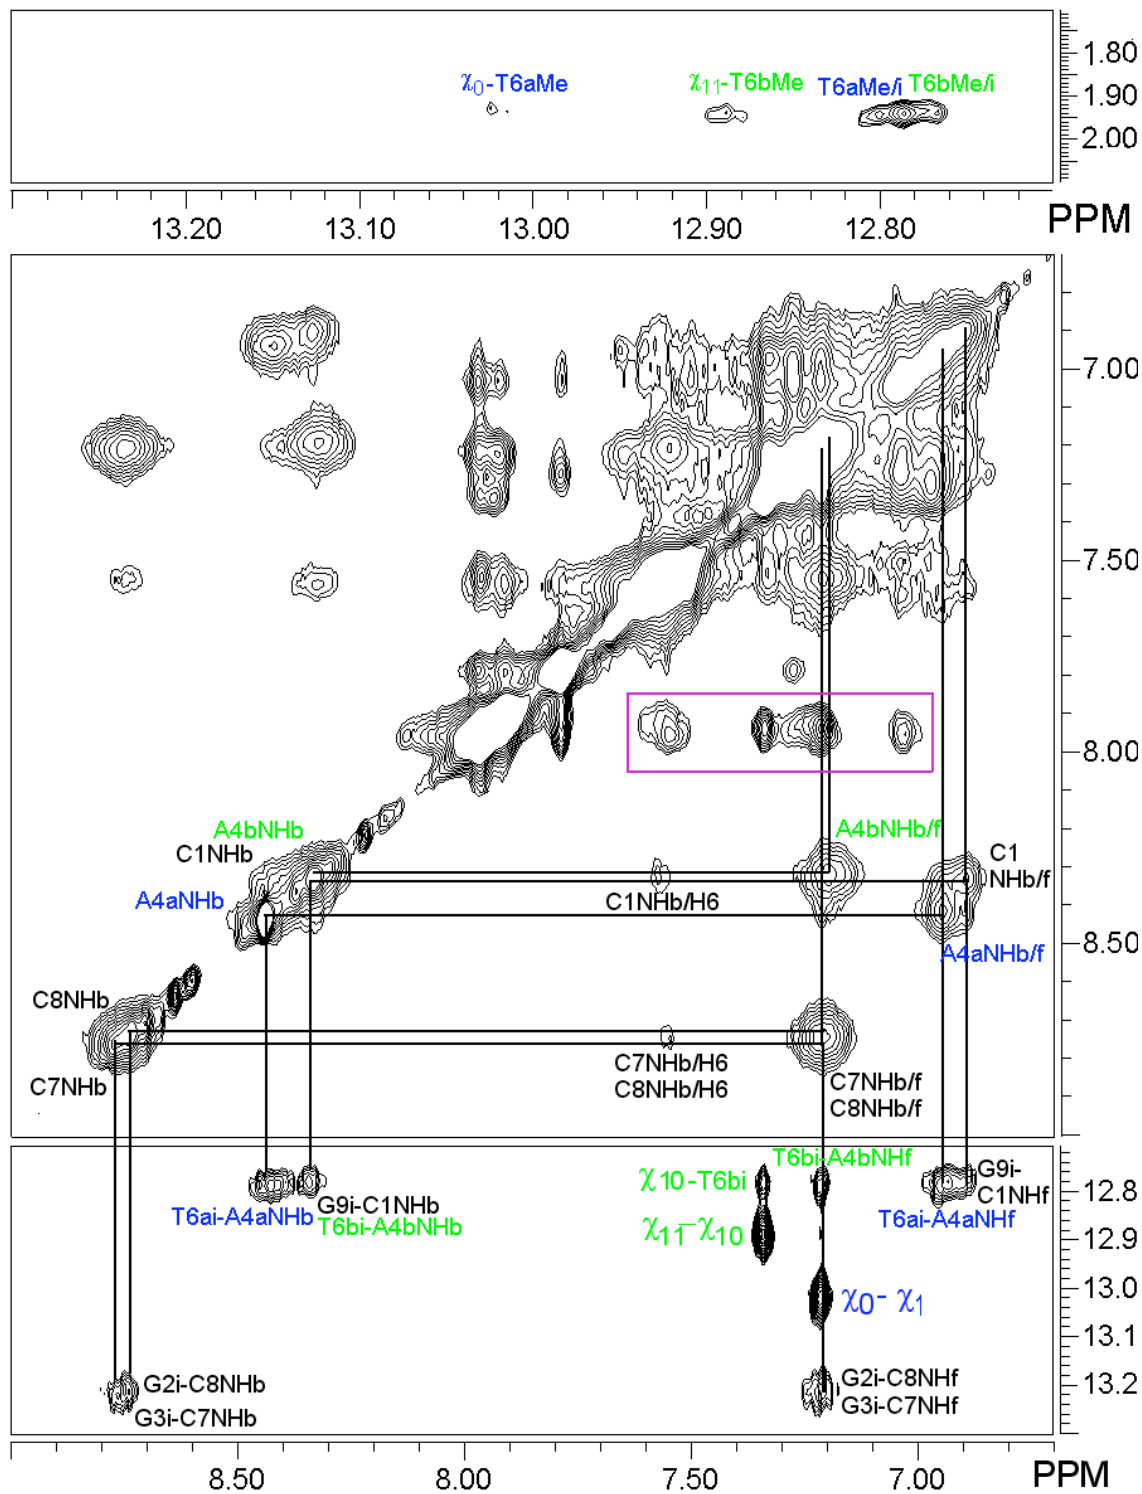

**Figure S7.** NOESY sub-spectra and assignments of the NOE contacts between the exchangeable protons of the Rh-bound DNA. (lower part: F2  $\times$  F1 : aromatic + amino  $\times$  imino; medium part: F2  $\times$  F1 : aromatic + amino  $\times$  aromatic + amino; upper part: F2  $\times$  F1 : imino  $\times$  T6Me groups). NHb and NHf correspond to the bound and free amino protons respectively. Loss of the C<sub>2</sub> symmetry in the central part of the oligonucleotide results in two unequivalent strands labeled a (blue) and b (green). Intramolecular nOe correlations between chrysi protons (labelled  $\chi$ ) are indicated by a purple rectangle. Experimental conditions: H<sub>2</sub>O, 4 °C, 300 ms mixing time.

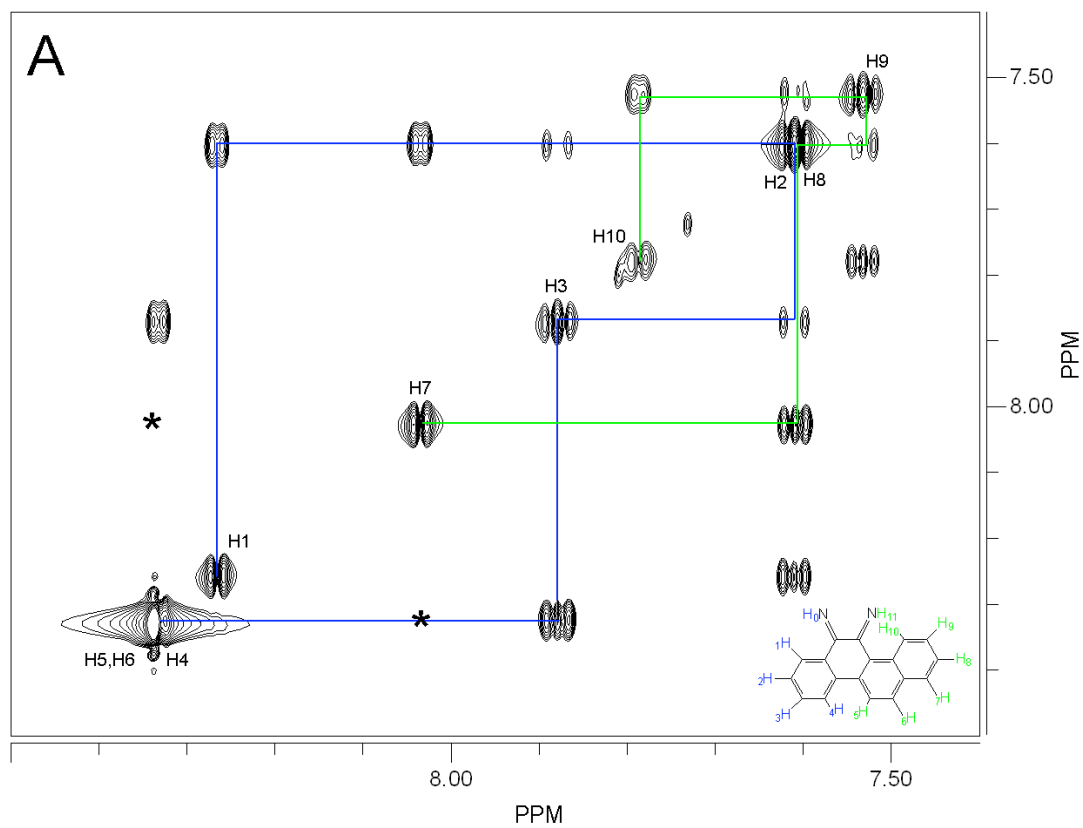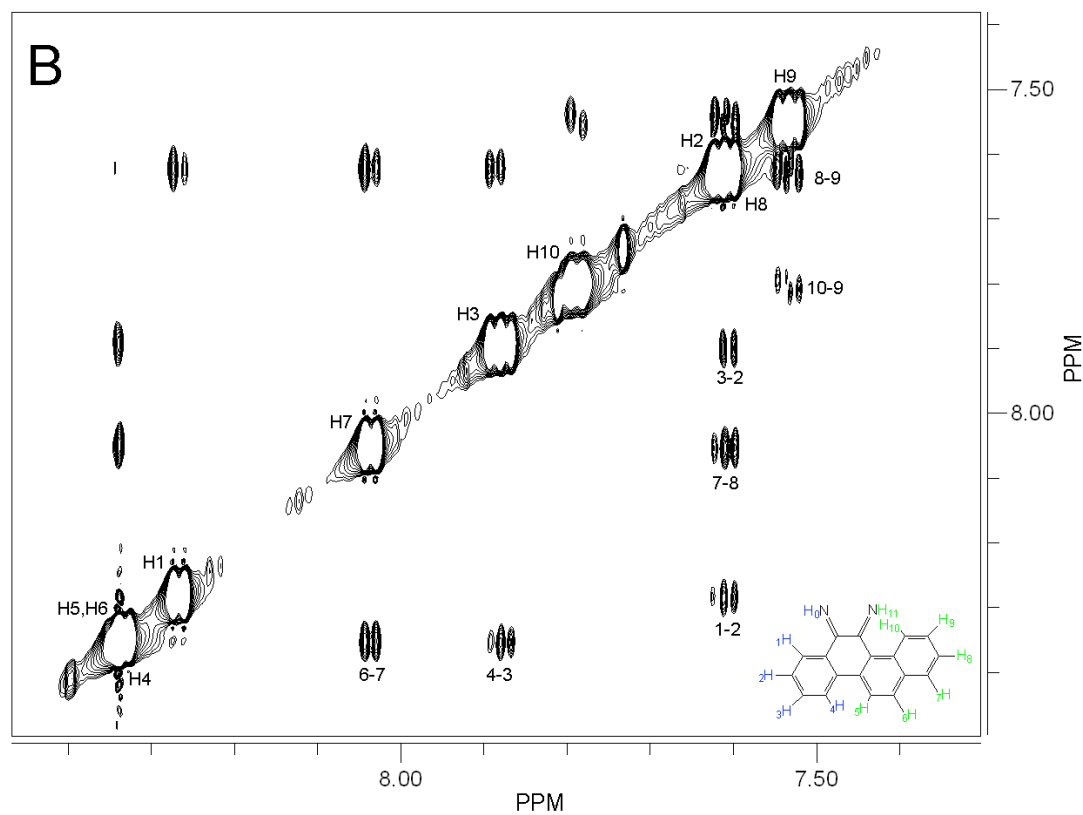

**Figure S8.** (a) COSY and (b) NOESY sub-spectra and assignments of the aromatic protons of the chrysi ligand of unbound  $\Delta$ -Rh(bpy-*d*<sub>8</sub>)<sub>2</sub>chrysi<sup>3+</sup> (D<sub>2</sub>O, 20 °C). In the COSY spectrum two chains of scalar correlations match the two spin systems of the ligand. \* Weak correlations observable only at low signal-to-noise resolution.
